# Supplementary material for: Nursing 12-Hour Shifts and Patient Incidents in Mental Health and Community Hospitals: A Longitudinal Study Using Routinely Collected Data
Source: Hindawi journal article supplement (doi:10.1155/2023/6626585), 2023-09-06

Figure S1

Deployment of long shifts at the ward level

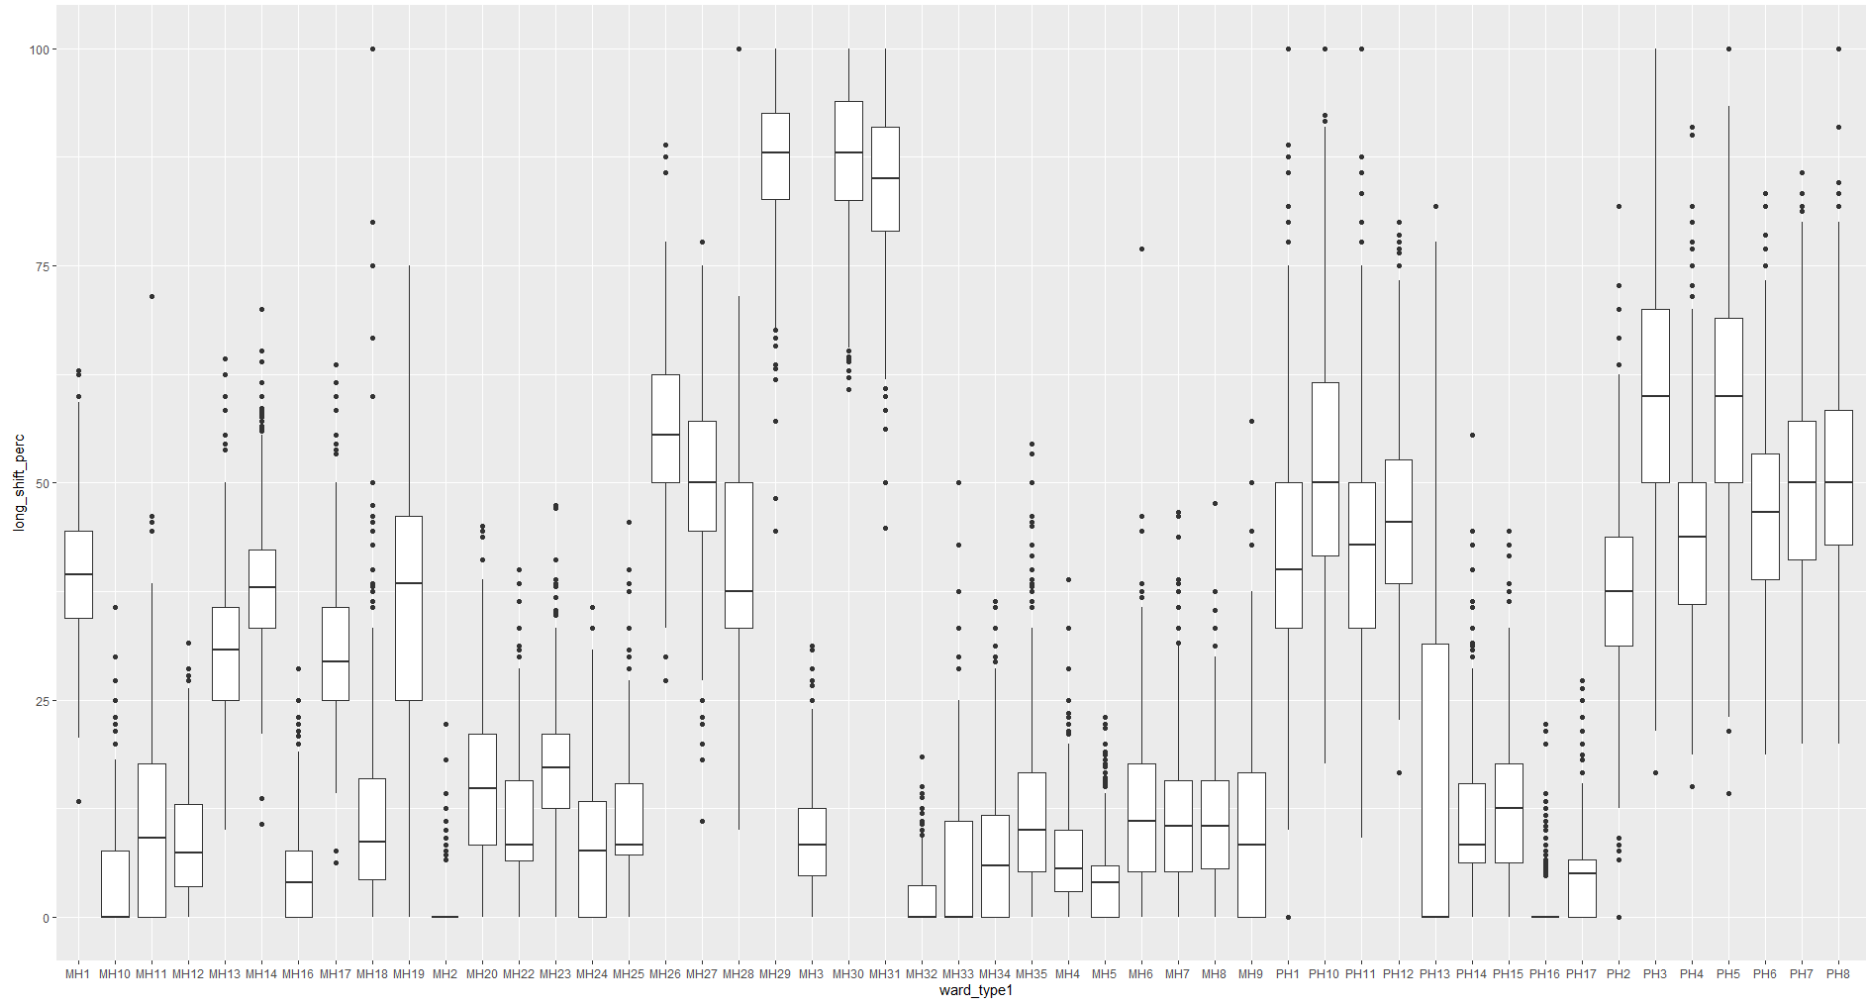

**Table S1** Full outputs of negative binomials mixed-effects and Poisson regressions for the association between 12+ hours shifts and patient incidents

| <b>Patient incidents</b>                  |          |           |
|-------------------------------------------|----------|-----------|
|                                           | <b>B</b> | <b>SE</b> |
| Intercept                                 | -3.917*  | 0.20      |
| Long shifts                               | 0.485*   | 0.20      |
| Long shift squared                        | -1.330*  | 0.57      |
| Long shifts cubic                         | 1.083*   | 0.43      |
| Staff per bed                             | 0.140*   | 0.01      |
| Substantial shifts                        | -0.109*  | 0.05      |
| Hours worked by RNs                       | 0.113    | 0.09      |
| Mental Health ward (ref: Physical Health) | 0.696*   | 0.24      |
| AIC                                       | 100938.8 |           |
| BIC                                       | 101027.1 |           |
| <b>Patient incidents with any harm</b>    |          |           |
|                                           | <b>B</b> | <b>SE</b> |
| Intercept                                 | -4.768*  | 0.26      |
| Long shifts                               | 0.01     | 0.32      |
| Long shift squared                        | 0.549    | 0.95      |
| Long shifts cubic                         | -0.232   | 0.70      |
| Staff per bed                             | 0.107*   | 0.01      |
| Substantial shifts                        | -0.131   | 0.08      |
| Hours worked by RNs                       | 0.050    | 0.15      |
| Mental Health ward (ref: Physical Health) | 0.403    | 0.29      |
| AIC                                       | 54609.8  |           |
| BIC                                       | 54698.1  |           |
| <b>Violence against Staff</b>             |          |           |
|                                           | <b>B</b> | <b>SE</b> |
| Intercept                                 | -7.24*   | 0.32      |
| Long shifts                               | -0.06    | 0.47      |
| Long shift squared                        | -2.74    | 1.54      |
| Long shifts cubic                         | 2.63*    | 1.12      |
| Staff per bed                             | 0.16*    | 0.01      |
| Substantial shifts                        | 0.06     | 0.11      |
| Hours worked by RNs                       | -0.56*   | 0.20      |
| Mental Health ward (ref: Physical Health) | 2.53*    | 0.36      |
| AIC                                       | 32323.0  |           |
| BIC                                       | 32411.3  |           |
| <b>Fall</b>                               |          |           |
|                                           | <b>B</b> | <b>SE</b> |
| Intercept                                 | -4.95*   | 0.33      |
| Long shifts                               | 0.19     | 0.55      |
| Long shift squared                        | -0.63    | 1.72      |
| Long shifts cubic                         | 0.37     | 1.49      |

|                                           |                             |           |
|-------------------------------------------|-----------------------------|-----------|
| Staff per bed                             | 0.05                        | 0.03      |
| Substantial shifts                        | -0.06                       | 0.14      |
| Hours worked by RNs                       | -0.02                       | 0.24      |
| Mental Health ward (ref: Physical Health) | -1.27*                      | 0.36      |
| AIC                                       | 25207.4                     |           |
| BIC                                       | 25286.9                     |           |
| <b>Self-Injury</b>                        |                             |           |
|                                           | <b>B</b>                    | <b>SE</b> |
| Intercept                                 | -11.05*                     | 0.67      |
| Long shifts                               | 0.833                       | 0.48      |
| Long shift squared                        | -0.660                      | 1.54      |
| Long shifts cubic                         | 0.547                       | 1.05      |
| Staff per bed                             | 0.102*                      | 0.01      |
| Substantial shifts                        | -0.47*                      | 0.11      |
| Hours worked by RNs                       | 0.34                        | 0.20      |
| Mental Health ward (ref: Physical Health) | 5.46*                       | 0.74      |
| AIC                                       | 28007.0                     |           |
| BIC                                       | 28095.3                     |           |
| <b>Disruptive Behaviour</b>               |                             |           |
|                                           | <b>B</b>                    | <b>SE</b> |
| Intercept                                 | -10.44*                     | 0.45      |
| Long shifts                               | 1.028                       | 0.55      |
| Long shift squared                        | -3.835*                     | 1.77      |
| Long shifts cubic                         | 3.274*                      | 1.22      |
| Staff per bed                             | 0.185*                      | 0.01      |
| Substantial shifts                        | -0.057                      | 0.13      |
| Hours worked by RNs                       | 1.015*                      | 0.23      |
| Mental Health ward (ref: Physical Health) | 4.341*                      | 0.48      |
| AIC                                       | 22879.1                     |           |
| BIC                                       | 22967.4                     |           |
| <b>Medicines Misuse</b>                   |                             |           |
|                                           | <b>(<math>\beta</math>)</b> | <b>SE</b> |
| Intercept                                 | -6.46*                      | 0.23      |
| Long shifts                               | 0.54                        | 0.58      |
| Long shift squared                        | -0.72                       | 1.75      |
| Long shifts cubic                         | 0.13                        | 1.41      |
| Staff per bed                             | 0.19*                       | 0.02      |
| Substantial shifts                        | 0.48*                       | 0.15      |
| Hours worked by RNs                       | -0.31                       | 0.26      |
| Mental Health ward (ref: Physical Health) | 0.41*                       | 0.18      |
| AIC                                       | 21856.9                     |           |
| BIC                                       | 21936.3                     |           |

\* p < 0.05

**Table S2** Outputs of negative binomials mixed-effects regressions for the association between 12+ hours shifts and patient incidents – Sensitivity analyses excluding outlier ward

|                                  | <b>Patient incidents (adjusted<sup>‡</sup>)</b>               |            |
|----------------------------------|---------------------------------------------------------------|------------|
|                                  | <b>B</b>                                                      | <b>SE</b>  |
| Proportion of long shifts        | 0.75*                                                         | 0.21       |
| Proportion of long shift squared | -1.82*                                                        | 0.61       |
| Proportion of long shifts cubic  | 1.34*                                                         | 0.45       |
|                                  | <b>AIC</b>                                                    | <b>BIC</b> |
| AIC/BIC                          | 97242.6                                                       | 97339.6    |
|                                  | <b>Patient incidents with any harm (adjusted<sup>‡</sup>)</b> |            |
|                                  | <b>B</b>                                                      | <b>SE</b>  |
| Proportion of long shifts        | 0.24                                                          | 0.33       |
| Proportion of long shift squared | -0.04                                                         | 0.95       |
| Proportion of long shifts cubic  | 0.11                                                          | 0.70       |
|                                  | <b>AIC</b>                                                    | <b>BIC</b> |
|                                  | 52500.4                                                       | 52597.4    |
|                                  | <b>Violence against staff (adjusted<sup>‡</sup>)</b>          |            |
|                                  | <b>B</b>                                                      | <b>SE</b>  |
| Proportion of long shifts        | 0.52                                                          | 0.50       |
| Proportion of long shift squared | -3.18*                                                        | 1.59       |
| Proportion of long shifts cubic  | 2.73*                                                         | 1.15       |
|                                  | <b>AIC</b>                                                    | <b>BIC</b> |
|                                  | 28953.8                                                       | 29050.7    |

\* p <0.05

<sup>‡</sup>Controlled for number of nursing staff per bed; proportion of substantive shifts; skill-mix (Registered Nurses hours/Registered Nurses + Healthcare Support Worker + Nursing Associate hours); type of ward (physical vs mental health)

**Figure S2** Sensitivity analysis - associations between the proportion of 12+ hour shifts and all incidents and violence against staff

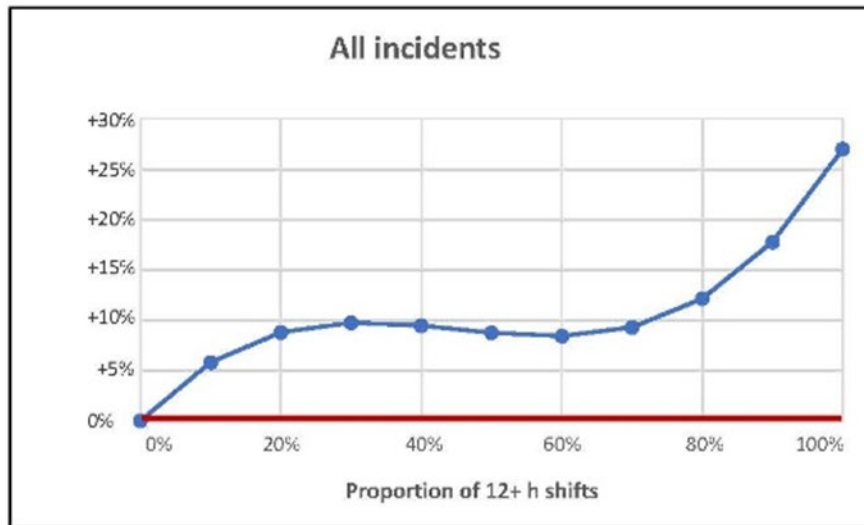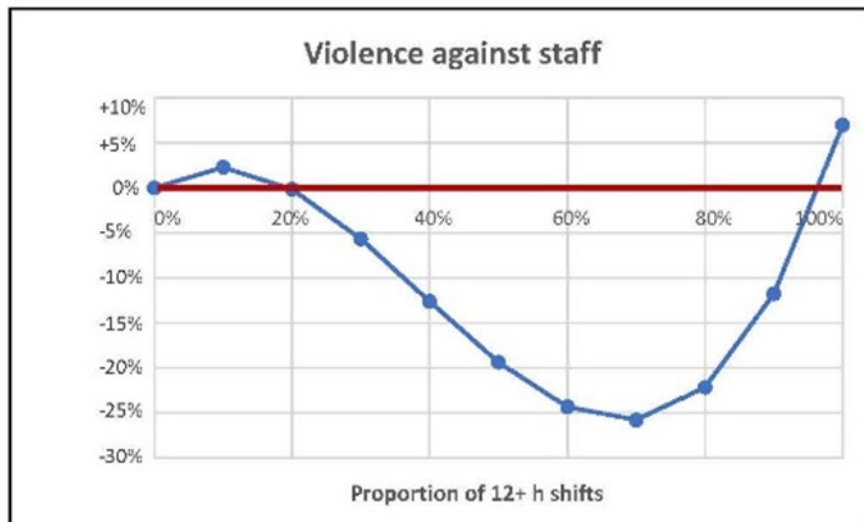

Supplement: f1 [file 6626585.f1.pdf]
